# Supplementary material
Source: MDPI journal article supplement (https://www.mdpi.com/2311-7524/8/10/888)
Supplement: s1 [file s1 › horticulturae-1917610-supplementary.pdf]

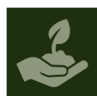

**Table S1.** Cultivars, abbreviation, seed source, and sowing date of cantaloupe and rootstock cultivars used for grafted and nongrafted treatments at Mount Vernon, WA, in 2020 and 2021.

| Cultivars               | Abbreviation <sup>z</sup> | Source                | Sowing date |         |
|-------------------------|---------------------------|-----------------------|-------------|---------|
|                         |                           |                       | 2020        | 2021    |
| Scions <sup>y</sup>     |                           |                       |             |         |
| Sugar Rush              | SR                        | Harris Seeds          | 23 Apr.     | 8 Apr.  |
| Goddess                 | G                         | Osborne Quality Seeds | 23 Apr.     | 8 Apr.  |
| Athena                  | A                         | Syngenta              | 23 Apr.     | 8 Apr.  |
| Rootstocks <sup>y</sup> |                           |                       |             |         |
| Carolina Strongback     | CS                        | Syngenta              | 27 Apr.     | 13 Apr. |
| Super Shintosa          | SS                        | Syngenta              | 7 May       | 22 Apr. |
| Carnivor                | CN                        | Syngenta              | 6 May       | 22 Apr. |
| Pelop                   | P                         | Rijk Zwaan            | 4 May       | 20 Apr. |
| Nongrafted scions       | - <sup>x</sup>            | Same as above         | 7 May       | 22 Apr. |

<sup>z</sup>All grafted treatments are denoted with abbreviations as scion/rootstock.

<sup>y</sup>Seedlings were grafted on 14 and 15 May 2020 and 26 and 27 April 2021.

<sup>x</sup>Abbreviations are not used for nongrafted treatments.
